# Supplementary material
Source: Frontiers journal article supplement (https://www.frontiersin.org/articles/180232)
Supplement: Image_1.PDF [file Image_1.PDF]

A

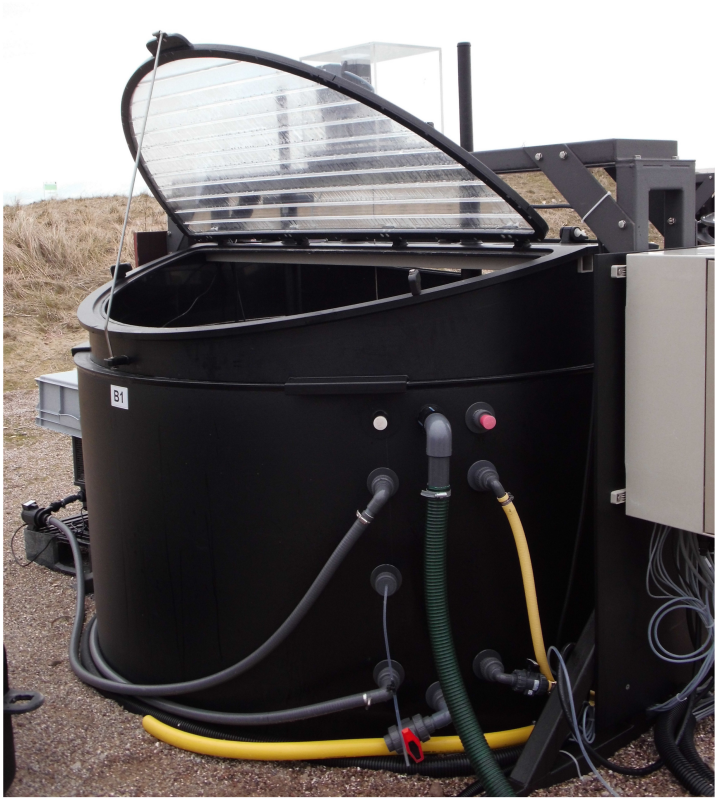

B

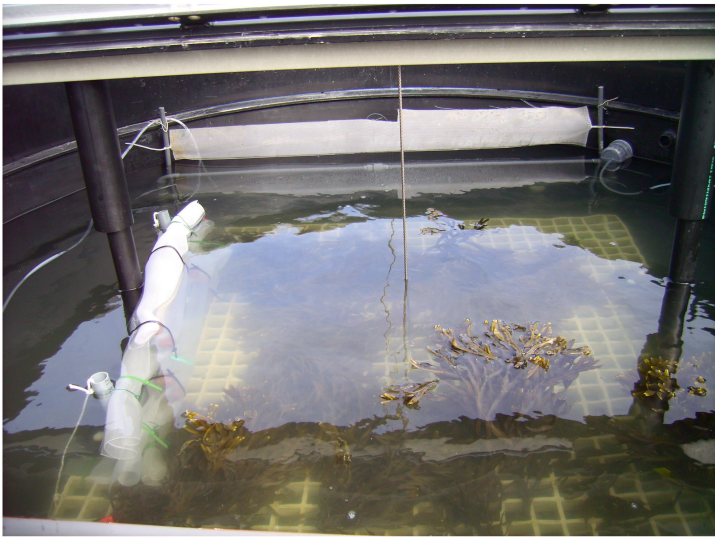

**Fig. S1 Benthic mesocosm facility on the island of Sylt (List, Germany).** (A) One of the 12 mesocosms with opened lid. (B) View inside one mesocosms onto the vertically adjustable grating populated with 11 individuals of *Fucus mytili*.
