# Supplementary material
Source: Frontiers journal article supplement (https://www.frontiersin.org/articles/180232)
Supplement: Image_5.PDF [file Image_5.PDF]

**A**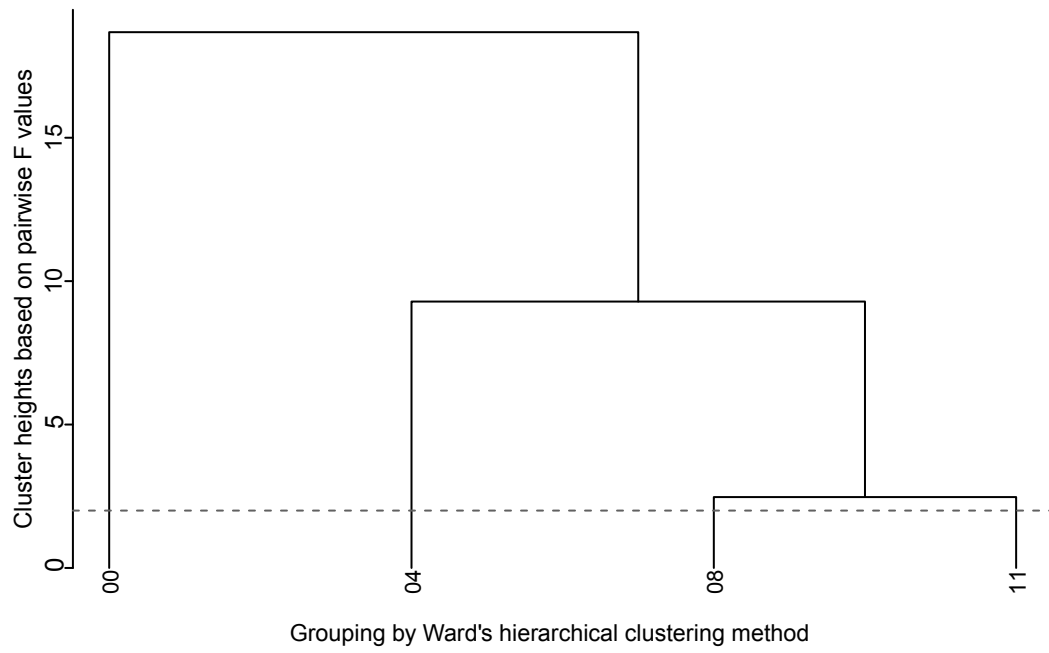**B**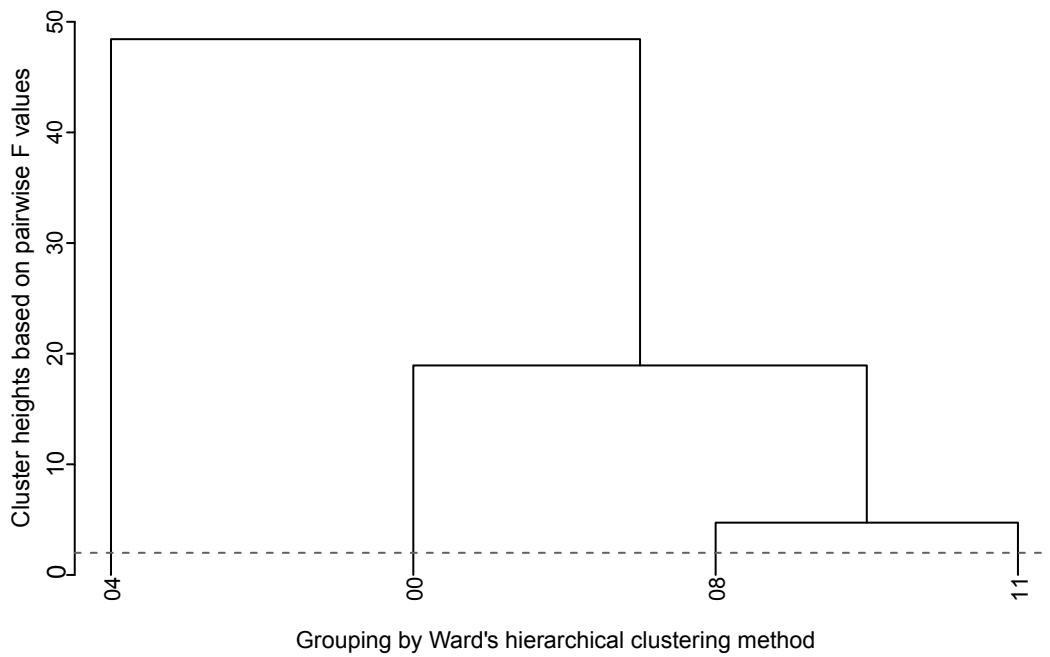

**Fig. S5 Week-wise evaluation of community patterns.** Clustering of Week levels for (A) *Fucus mytili* biofilm and (B) water samples: Grouping by Ward's hierarchical clustering method (for Weeks 00, 04, 08, 11) with Cluster heights based on pairwise F values.  $F \geq 2$  indicates a threshold (dotted line) with bacterial communities differing markedly.
